# Supplementary material for: Epicardial Atrial Fat at Cardiac Magnetic Resonance Imaging and AF Recurrence after Transcatheter Ablation
Source: Preprints.org preprint supplement (doi:10.20944/preprints202312.1440.v1), 2023-12-19

**Epicardial atrial fat at cardiac magnetic resonance imaging and AF recurrence after transcatheter ablation**

*Supplementary Material*

**Figure S1**. Direct comparison of the absolute LA EAT volume according to recurrence status.


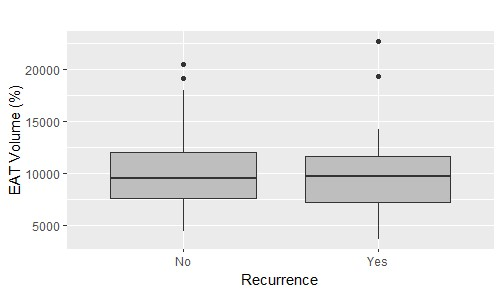


**Figure S2**. ROC curve analysis for the absolute LA EAT volume. Finest cut-off identified with the Youden index wass 19.2 ml with a sensitivity of 0.12, a specificity of 0.97, positive predictive value of 0.67 and negative predictive value of 0.68.


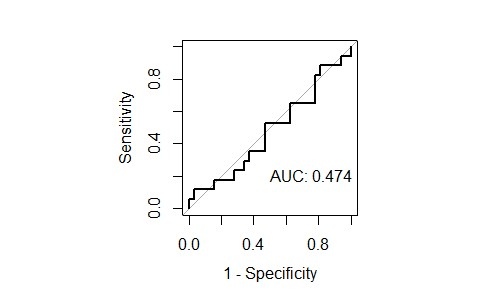


**Figure S3**. Kaplan-Meier arrhythmia-free survival curves stratified by the absolute LA EAT volume above o below 19.2 ml, showing no statistically significant difference (62% vs 33%; p-value=0.2).


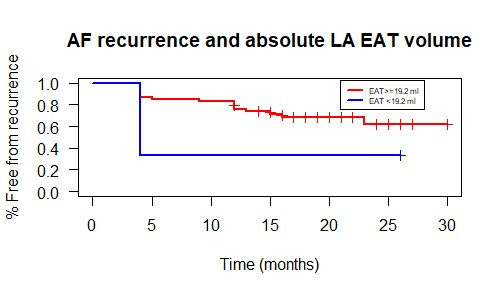

Supplement: Supplementary file 1 [file supplementary]
